# Supplementary material for: Towards biodegradable conducting polymers by incorporating seaweed cellulose for decomposable wearable heaters
Source: Royal Society of Chemistry journal article supplement (doi:10.1039/d3ra04927b), 2023-01-01
Supplement: d3ra04927b1.pdf [file d3ra04927b1.pdf]

## Electronic Supplementary Information

# Towards biodegradable conducting polymer by incorporating seaweed cellulose for decomposable wearable heater

*Mei Ying Teo,<sup>a</sup> Keemi Lim,<sup>b</sup> Kean C Aw,<sup>a</sup> Seyoung Kee<sup>\*c</sup> and Jonathan Stringer<sup>\*a</sup>*

<sup>a</sup> Department of Mechanical Engineering, The University of Auckland, Symonds Street, Auckland, 1010, New Zealand

<sup>b</sup> Department of Chemical and Materials Engineering, The University of Auckland, Symonds Street, Auckland, 1010, New Zealand

<sup>c</sup> Department of Polymer Engineering, Pukyong National University, Busan 48513, Republic of Korea

KEYWORDS. Biodegradable Electronics, PEDOT:PSS, Conducting Polymer, Wearable Heater, Seaweed Cellulose

Corresponding Author: *j.stringer@auckland.ac.nz*

Corresponding Author: *sykee@pknu.ac.kr*

## Experimental Section

**Chemical and Materials:** PEDOT:PSS aqueous solution (Clevios PH1000) was purchased from Heraeus (Germany) and filtered using a 0.45  $\mu\text{m}$  filter. Seaweed cellulose was supplied by Scion (New Zealand) and glycerol (G7757, CAS 56-81-5) was purchased from Sigma-Aldrich. The PEDOT:PSS composite solution was a mixture of PEDOT:PSS, cellulose and glycerol with the ratio of 10:5:8 (ml) and stirred for about 15 min. The PEDOT:PSS composite solution was then poured into petri dish or acrylic mould and dried in an oven at 60  $^{\circ}\text{C}$  for two days. The PEDOT:PSS composite films was then peeled off and further dried at 120  $^{\circ}\text{C}$  for 15 min. Films for SEM measurements were prepared by drop-casting the solutions onto silicon substrates. Samples that contained glycerol was washed with DI water and dried before the SEM observation.

**Characterisation:** The conductivity of the films was measured using four-point method. The current and voltage were applied and measured using 4-wire sensing mode with an Agilent B2901A Precision Source/Measure Unit. Raman spectroscopy was done using Labram HR Evolution (Horiba Japan), 532 nm wavelength, 1% neutral density filter, x100 VIS, acquired time 60 s with 5 accumulations, 1800 (450-850 nm) grating. SEM images were obtained using an analytical field emission SEM (Hitachi SU-70, Japan) operated at 10 kV. Samples were Pt-sputtered using Hitachi E-1045 ion sputter with Pt target and a current of 25 mA for 30 s. ATR-FTIR measurement was done using a Perkin Elmer 100 spectrophotometer (Waltham, MA, USA). The FTIR spectra were acquired in the range of 400–4000 with a resolution of 4  $\text{cm}^{-1}$  and averaged over 32 scans. Thermogravimetric analysis was carried out on TGA Q500 with a heating rate of 10  $^{\circ}\text{C}/\text{min}$  to 600  $^{\circ}\text{C}$  in argon atmosphere. The heating characteristics and thermal images were determined by a Fluke Thermal Imager with an ESCORT 3060TD Dual-tracking DC power supply.

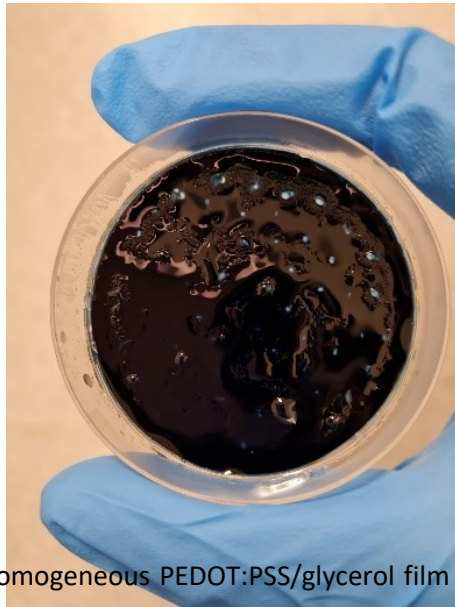

**Fig. S1** Photograph of a non-homogeneous PEDOT:PSS/glycerol film formed on a petri dish without the additional of s-cellulose.

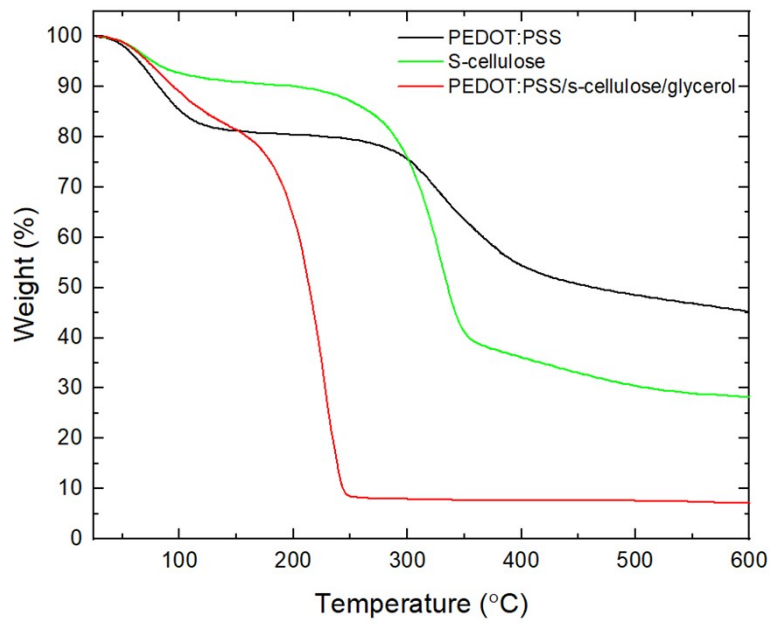

**Fig. S2** TGA for PEDOT:PSS, s-cellulose and PEDOT:PSS composite film.

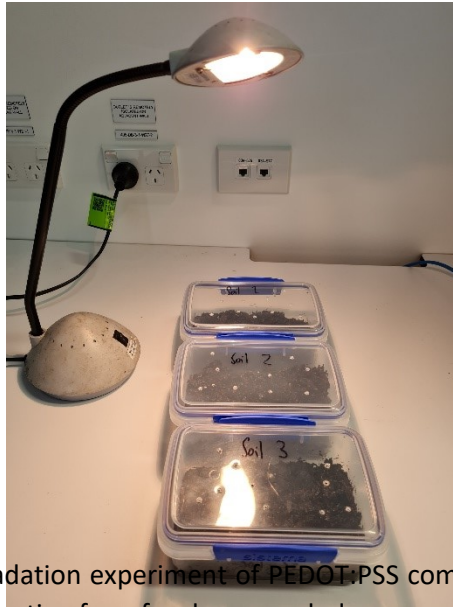

**Fig. S3** The setup for the degradation experiment of PEDOT:PSS composite films in soil, with a lamp serving as a simulated sun, operating for a few hours each day.

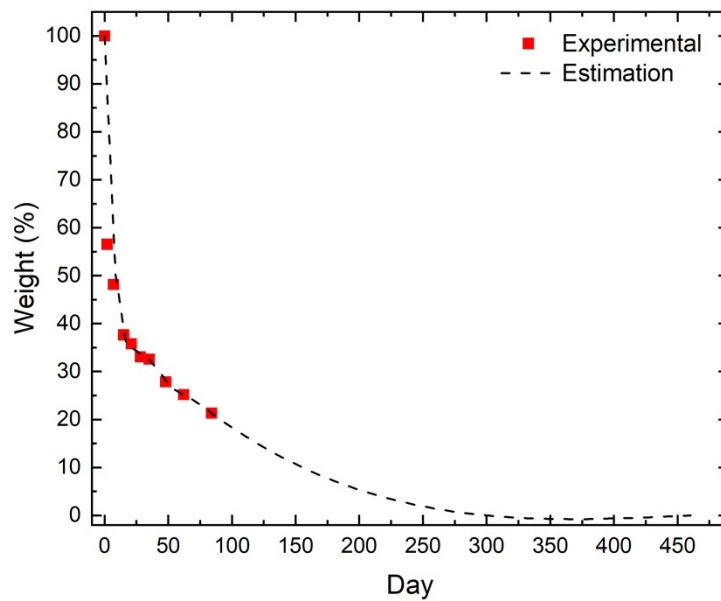

**Fig. S4** The estimated number of days required for the complete degradation of the PEDOT:PSS composite film, based on the collected experimental data.

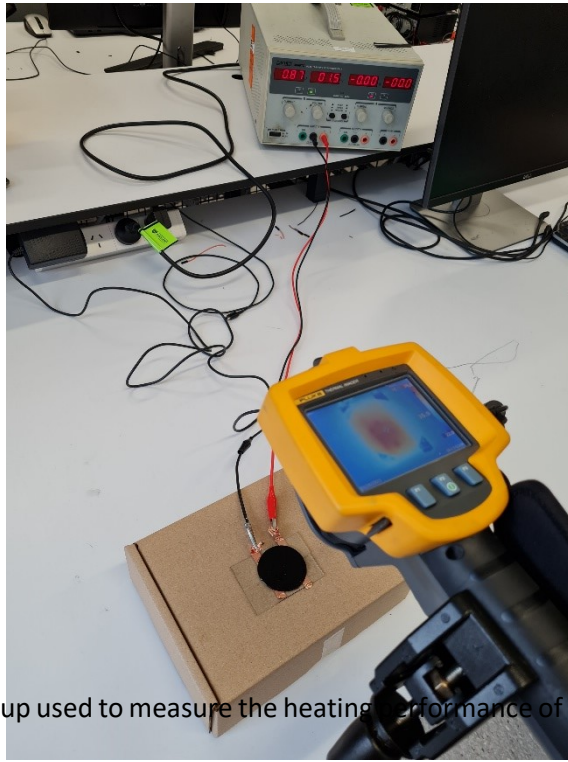

**Fig. S5** Photograph of a setup used to measure the heating performance of PEDOT:PSS composite films using a DC power supply.

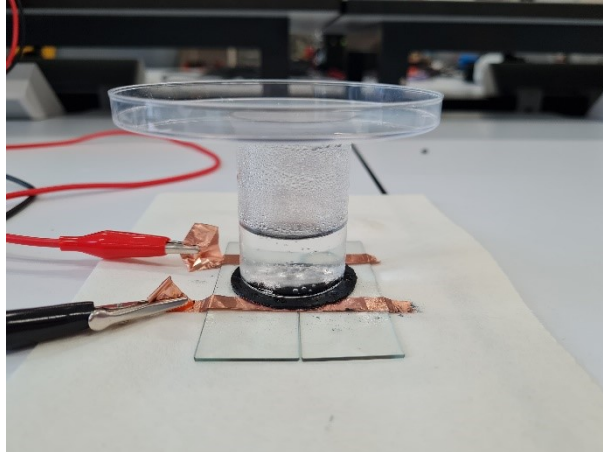

**Fig. S6** Heating DI water with PEDOT:PSS composite film.
